# Supplementary material
Source: publisher site journal article supplement (https://www.spandidos-publications.com/3700/downloadSupplementary)

Figure S1. Analysis of TUSC1 expression and glioblastoma prognosis based on TCGA database. The expression levels of TUSC1 in glioma and non-tumor tissue and the correlation between TUSC1 expression and prognosis from TCGA database. TUSC1, tumor suppressor candidate 1; TCGA, The Cancer Genome Atlas.

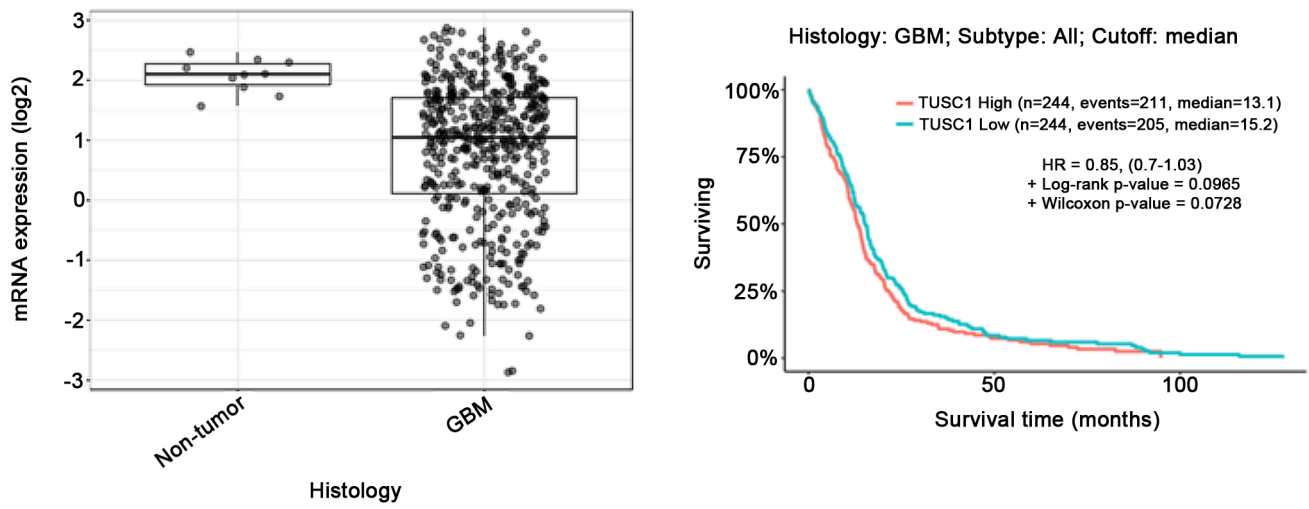

Supplement: Supplementary file 1 [file downloadSupplementary]
